# Supplementary material for: Qing-Re-Xiao-Zheng Formula Modulates Gut Microbiota and Inhibits Inflammation in Mice With Diabetic Kidney Disease
Source: Front Med (Lausanne). 2021 Sep 16;8:719950. doi: 10.3389/fmed.2021.719950 (PMC8481597; doi:10.3389/fmed.2021.719950)
Supplement: Supplementary file 4 [file Table_6.XLSX]

## Sheet: species rank
species	value	Sample
1	1	0.44867	control-1
2	2	0.0373892	control-1
3	3	0.0273156	control-1
4	4	0.0224109	control-1
5	5	0.0201849	control-1
6	6	0.0138842	control-1
7	7	0.0132051	control-1
8	8	0.0121109	control-1
9	9	0.0120355	control-1
10	10	0.011545	control-1
11	11	0.0110922	control-1
12	12	0.0110168	control-1
13	13	0.0108281	control-1
14	14	0.0107527	control-1
15	15	0.0106772	control-1
16	16	0.010564	control-1
17	17	0.0101113	control-1
18	18	0.0100736	control-1
19	19	0.00965855	control-1
20	20	0.00916808	control-1
21	21	0.00879079	control-1
22	22	0.00871534	control-1
23	23	0.00860215	control-1
24	24	0.00852669	control-1
25	25	0.00833805	control-1
26	26	0.00792303	control-1
27	27	0.00784758	control-1
28	28	0.0073571	control-1
29	29	0.00637616	control-1
30	30	0.0063007	control-1
31	31	0.00573477	control-1
32	32	0.00543294	control-1
33	33	0.00543294	control-1
34	34	0.00509338	control-1
35	35	0.00505565	control-1
36	36	0.00498019	control-1
37	37	0.00490473	control-1
38	38	0.00475382	control-1
39	39	0.00445199	control-1
40	40	0.00441426	control-1
41	41	0.00426335	control-1
42	42	0.00399925	control-1
43	43	0.00399925	control-1
44	44	0.00384833	control-1
45	45	0.00282965	control-1
46	46	0.00279193	control-1
47	47	0.00271647	control-1
48	48	0.00271647	control-1
49	49	0.00271647	control-1
50	50	0.00256555	control-1
51	51	0.00252782	control-1
52	52	0.00233918	control-1
53	53	0.00230145	control-1
54	54	0.00226372	control-1
55	55	0.002226	control-1
56	56	0.002226	control-1
57	57	0.00215054	control-1
58	58	0.00207508	control-1
59	59	0.00203735	control-1
60	60	0.00196189	control-1
61	61	0.00192417	control-1
62	62	0.00177325	control-1
63	63	0.00177325	control-1
64	64	0.00169779	control-1
65	65	0.00166006	control-1
66	66	0.00166006	control-1
67	67	0.00166006	control-1
68	68	0.00166006	control-1
69	69	0.00154688	control-1
70	70	0.00147142	control-1
71	71	0.00147142	control-1
72	72	0.00147142	control-1
73	73	0.00139596	control-1
74	74	0.00139596	control-1
75	75	0.00139596	control-1
76	76	0.00139596	control-1
77	77	0.00139596	control-1
78	78	0.00135823	control-1
79	79	0.00132051	control-1
80	80	0.00132051	control-1
81	81	0.00132051	control-1
82	82	0.00128278	control-1
83	83	0.00128278	control-1
84	84	0.00128278	control-1
85	85	0.00124505	control-1
86	86	0.00124505	control-1
87	87	0.00124505	control-1
88	88	0.00124505	control-1
89	89	0.00120732	control-1
90	90	0.00120732	control-1
91	91	0.00120732	control-1
92	92	0.00113186	control-1
93	93	0.0010564	control-1
94	94	0.00101868	control-1
95	95	0.00101868	control-1
96	96	0.000980947	control-1
97	97	0.000943218	control-1
98	98	0.000943218	control-1
99	99	0.000943218	control-1
100	100	0.00090549	control-1
101	101	0.00090549	control-1
102	102	0.000867761	control-1
103	103	0.000867761	control-1
104	104	0.000867761	control-1
105	105	0.000830032	control-1
106	106	0.000792303	control-1
107	107	0.000792303	control-1
108	108	0.000792303	control-1
109	109	0.000792303	control-1
110	110	0.000792303	control-1
111	111	0.000754575	control-1
112	112	0.000754575	control-1
113	113	0.000679117	control-1
114	114	0.000679117	control-1
115	115	0.000679117	control-1
116	116	0.000641388	control-1
117	117	0.00060366	control-1
118	118	0.00060366	control-1
119	119	0.00060366	control-1
120	120	0.00060366	control-1
121	121	0.00060366	control-1
122	122	0.000565931	control-1
123	123	0.000565931	control-1
124	124	0.000565931	control-1
125	125	0.000565931	control-1
126	126	0.000565931	control-1
127	127	0.000490473	control-1
128	128	0.000490473	control-1
129	129	0.000452745	control-1
130	130	0.000452745	control-1
131	131	0.000452745	control-1
132	132	0.000452745	control-1
133	133	0.000415016	control-1
134	134	0.000415016	control-1
135	135	0.000415016	control-1
136	136	0.000377287	control-1
137	137	0.000377287	control-1
138	138	0.000377287	control-1
139	139	0.000377287	control-1
140	140	0.000377287	control-1
141	141	0.000377287	control-1
142	142	0.000377287	control-1
143	143	0.000377287	control-1
144	144	0.000377287	control-1
145	145	0.000339559	control-1
146	146	0.000339559	control-1
147	147	0.000339559	control-1
148	148	0.000339559	control-1
149	149	0.000339559	control-1
150	150	0.00030183	control-1
151	151	0.00030183	control-1
152	152	0.00030183	control-1
153	153	0.00030183	control-1
154	154	0.00030183	control-1
155	155	0.00030183	control-1
156	156	0.00030183	control-1
157	157	0.000264101	control-1
158	158	0.000264101	control-1
159	159	0.000264101	control-1
160	160	0.000264101	control-1
161	161	0.000226372	control-1
162	162	0.000226372	control-1
163	163	0.000226372	control-1
164	164	0.000226372	control-1
165	165	0.000226372	control-1
166	166	0.000226372	control-1
167	167	0.000226372	control-1
168	168	0.000188644	control-1
169	169	0.000188644	control-1
170	170	0.000188644	control-1
171	171	0.000188644	control-1
172	172	0.000188644	control-1
173	173	0.000188644	control-1
174	174	0.000188644	control-1
175	175	0.000188644	control-1
176	176	0.000188644	control-1
177	177	0.000150915	control-1
178	178	0.000150915	control-1
179	179	0.000150915	control-1
180	180	0.000150915	control-1
181	181	0.000150915	control-1
182	182	0.000150915	control-1
183	183	0.000150915	control-1
184	184	0.000150915	control-1
185	185	0.000113186	control-1
186	186	0.000113186	control-1
187	187	0.000113186	control-1
188	188	0.000113186	control-1
189	189	0.000113186	control-1
190	190	0.000113186	control-1
191	191	0.000113186	control-1
192	192	0.000113186	control-1
193	193	0.000113186	control-1
194	194	0.000113186	control-1
195	195	0.000113186	control-1
196	196	0.000113186	control-1
197	197	0.000113186	control-1
198	198	0.000113186	control-1
199	199	7.54575e-05	control-1
200	200	7.54575e-05	control-1
201	201	7.54575e-05	control-1
202	202	7.54575e-05	control-1
203	203	7.54575e-05	control-1
204	204	7.54575e-05	control-1
205	205	7.54575e-05	control-1
206	206	7.54575e-05	control-1
207	207	7.54575e-05	control-1
208	208	7.54575e-05	control-1
209	209	7.54575e-05	control-1
210	210	7.54575e-05	control-1
211	211	7.54575e-05	control-1
212	212	7.54575e-05	control-1
213	213	7.54575e-05	control-1
214	214	7.54575e-05	control-1
215	215	7.54575e-05	control-1
216	216	7.54575e-05	control-1
217	217	7.54575e-05	control-1
218	218	7.54575e-05	control-1
219	219	7.54575e-05	control-1
220	220	7.54575e-05	control-1
221	221	7.54575e-05	control-1
222	222	7.54575e-05	control-1
223	223	7.54575e-05	control-1
224	224	3.77287e-05	control-1
225	225	3.77287e-05	control-1
226	226	3.77287e-05	control-1
227	227	3.77287e-05	control-1
228	228	3.77287e-05	control-1
229	229	3.77287e-05	control-1
230	230	3.77287e-05	control-1
231	231	3.77287e-05	control-1
232	232	3.77287e-05	control-1
233	233	3.77287e-05	control-1
234	234	3.77287e-05	control-1
235	235	3.77287e-05	control-1
236	236	3.77287e-05	control-1
237	237	3.77287e-05	control-1
238	238	3.77287e-05	control-1
239	239	3.77287e-05	control-1
240	240	3.77287e-05	control-1
241	241	3.77287e-05	control-1
242	242	3.77287e-05	control-1
243	243	3.77287e-05	control-1
244	244	3.77287e-05	control-1
245	245	3.77287e-05	control-1
246	246	3.77287e-05	control-1
247	247	3.77287e-05	control-1
248	248	3.77287e-05	control-1
249	249	3.77287e-05	control-1
250	250	3.77287e-05	control-1
251	251	3.77287e-05	control-1
252	252	3.77287e-05	control-1
253	253	3.77287e-05	control-1
254	254	3.77287e-05	control-1
255	255	3.77287e-05	control-1
256	256	3.77287e-05	control-1
257	257	3.77287e-05	control-1
258	258	3.77287e-05	control-1
259	259	3.77287e-05	control-1
260	260	3.77287e-05	control-1
261	261	3.77287e-05	control-1
262	262	3.77287e-05	control-1
263	263	3.77287e-05	control-1
264	264	3.77287e-05	control-1
265	265	3.77287e-05	control-1
266	266	3.77287e-05	control-1
267	267	3.77287e-05	control-1
268	1	0.113224	control-2
269	2	0.108055	control-2
270	3	0.0890398	control-2
271	4	0.0811922	control-2
272	5	0.0673081	control-2
273	6	0.0329749	control-2
274	7	0.0288625	control-2
275	8	0.0285606	control-2
276	9	0.0267119	control-2
277	10	0.022675	control-2
278	11	0.0222977	control-2
279	12	0.0185248	control-2
280	13	0.0182984	control-2
281	14	0.0177325	control-2
282	15	0.0169779	control-2
283	16	0.0160724	control-2
284	17	0.0135823	control-2
285	18	0.0113563	control-2
286	19	0.0102245	control-2
287	20	0.00996038	control-2
288	21	0.00973401	control-2
289	22	0.00928127	control-2
290	23	0.00924354	control-2
291	24	0.00856442	control-2
292	25	0.00830032	control-2
293	26	0.0078853	control-2
294	27	0.00701754	control-2
295	28	0.00618751	control-2
296	29	0.00562158	control-2
297	30	0.00562158	control-2
298	31	0.00543294	control-2
299	32	0.00520656	control-2
300	33	0.00490473	control-2
301	34	0.00486701	control-2
302	35	0.00445199	control-2
303	36	0.0043388	control-2
304	37	0.0043388	control-2
305	38	0.0043388	control-2
306	39	0.00384833	control-2
307	40	0.00362196	control-2
308	41	0.00343331	control-2
309	42	0.00335786	control-2
310	43	0.00316921	control-2
311	44	0.00316921	control-2
312	45	0.00282965	control-2
313	46	0.00271647	control-2
314	47	0.00267874	control-2
315	48	0.00237691	control-2
316	49	0.00230145	control-2
317	50	0.00226372	control-2
318	51	0.00211281	control-2
319	52	0.00203735	control-2
320	53	0.00196189	control-2
321	54	0.00196189	control-2
322	55	0.00196189	control-2
323	56	0.00196189	control-2
324	57	0.00188644	control-2
325	58	0.00188644	control-2
326	59	0.00181098	control-2
327	60	0.00173552	control-2
328	61	0.00166006	control-2
329	62	0.00166006	control-2
330	63	0.00150915	control-2
331	64	0.00147142	control-2
332	65	0.00147142	control-2
333	66	0.00135823	control-2
334	67	0.00135823	control-2
335	68	0.00132051	control-2
336	69	0.00128278	control-2
337	70	0.00128278	control-2
338	71	0.00124505	control-2
339	72	0.00124505	control-2
340	73	0.00124505	control-2
341	74	0.00120732	control-2
342	75	0.00120732	control-2
343	76	0.00113186	control-2
344	77	0.00109413	control-2
345	78	0.00109413	control-2
346	79	0.0010564	control-2
347	80	0.00101868	control-2
348	81	0.000980947	control-2
349	82	0.000943218	control-2
350	83	0.00090549	control-2
351	84	0.000867761	control-2
352	85	0.000867761	control-2
353	86	0.000830032	control-2
354	87	0.000830032	control-2
355	88	0.000792303	control-2
356	89	0.000792303	control-2
357	90	0.000792303	control-2
358	91	0.000754575	control-2
359	92	0.000754575	control-2
360	93	0.000754575	control-2
361	94	0.000754575	control-2
362	95	0.000716846	control-2
363	96	0.000716846	control-2
364	97	0.000716846	control-2
365	98	0.000679117	control-2
366	99	0.000641388	control-2
367	100	0.000641388	control-2
368	101	0.000641388	control-2
369	102	0.00060366	control-2
370	103	0.00060366	control-2
371	104	0.00060366	control-2
372	105	0.00060366	control-2
373	106	0.000565931	control-2
374	107	0.000565931	control-2
375	108	0.000565931	control-2
376	109	0.000528202	control-2
377	110	0.000528202	control-2
378	111	0.000528202	control-2
379	112	0.000490473	control-2
380	113	0.000490473	control-2
381	114	0.000490473	control-2
382	115	0.000452745	control-2
383	116	0.000452745	control-2
384	117	0.000452745	control-2
385	118	0.000452745	control-2
386	119	0.000452745	control-2
387	120	0.000415016	control-2
388	121	0.000415016	control-2
389	122	0.000415016	control-2
390	123	0.000415016	control-2
391	124	0.000377287	control-2
392	125	0.000377287	control-2
393	126	0.000339559	control-2
394	127	0.000339559	control-2
395	128	0.000339559	control-2
396	129	0.000339559	control-2
397	130	0.000339559	control-2
398	131	0.00030183	control-2
399	132	0.00030183	control-2
400	133	0.00030183	control-2
401	134	0.00030183	control-2
402	135	0.00030183	control-2
403	136	0.00030183	control-2
404	137	0.00030183	control-2
405	138	0.00030183	control-2
406	139	0.00030183	control-2
407	140	0.00030183	control-2
408	141	0.00030183	control-2
409	142	0.00030183	control-2
410	143	0.00030183	control-2
411	144	0.000264101	control-2
412	145	0.000264101	control-2
413	146	0.000264101	control-2
414	147	0.000264101	control-2
415	148	0.000264101	control-2
416	149	0.000264101	control-2
417	150	0.000226372	control-2
418	151	0.000226372	control-2
419	152	0.000226372	control-2
420	153	0.000226372	control-2
421	154	0.000226372	control-2
422	155	0.000188644	control-2
423	156	0.000188644	control-2
424	157	0.000188644	control-2
425	158	0.000188644	control-2
426	159	0.000188644	control-2
427	160	0.000188644	control-2
428	161	0.000188644	control-2
429	162	0.000188644	control-2
430	163	0.000188644	control-2
431	164	0.000188644	control-2
432	165	0.000150915	control-2
433	166	0.000150915	control-2
434	167	0.000150915	control-2
435	168	0.000150915	control-2
436	169	0.000150915	control-2
437	170	0.000150915	control-2
438	171	0.000150915	control-2
439	172	0.000150915	control-2
440	173	0.000150915	control-2
441	174	0.000150915	control-2
442	175	0.000150915	control-2
443	176	0.000150915	control-2
444	177	0.000150915	control-2
445	178	0.000113186	control-2
446	179	0.000113186	control-2
447	180	0.000113186	control-2
448	181	0.000113186	control-2
449	182	0.000113186	control-2
450	183	0.000113186	control-2
451	184	0.000113186	control-2
452	185	0.000113186	control-2
453	186	0.000113186	control-2
454	187	0.000113186	control-2
455	188	0.000113186	control-2
456	189	0.000113186	control-2
457	190	0.000113186	control-2
458	191	0.000113186	control-2
459	192	0.000113186	control-2
460	193	0.000113186	control-2
461	194	0.000113186	control-2
462	195	0.000113186	control-2
463	196	7.54575e-05	control-2
464	197	7.54575e-05	control-2
465	198	7.54575e-05	control-2
466	199	7.54575e-05	control-2
467	200	7.54575e-05	control-2
468	201	7.54575e-05	control-2
469	202	7.54575e-05	control-2
470	203	7.54575e-05	control-2
471	204	7.54575e-05	control-2
472	205	7.54575e-05	control-2
473	206	7.54575e-05	control-2
474	207	7.54575e-05	control-2
475	208	7.54575e-05	control-2
476	209	7.54575e-05	control-2
477	210	7.54575e-05	control-2
478	211	7.54575e-05	control-2
479	212	7.54575e-05	control-2
480	213	7.54575e-05	control-2
481	214	7.54575e-05	control-2
482	215	7.54575e-05	control-2
483	216	7.54575e-05	control-2
484	217	7.54575e-05	control-2
485	218	7.54575e-05	control-2
486	219	7.54575e-05	control-2
487	220	7.54575e-05	control-2
488	221	7.54575e-05	control-2
489	222	7.54575e-05	control-2
490	223	7.54575e-05	control-2
491	224	7.54575e-05	control-2
492	225	7.54575e-05	control-2
493	226	7.54575e-05	control-2
494	227	7.54575e-05	control-2
495	228	7.54575e-05	control-2
496	229	7.54575e-05	control-2
497	230	7.54575e-05	control-2
498	231	7.54575e-05	control-2
499	232	7.54575e-05	control-2
500	233	7.54575e-05	control-2
501	234	7.54575e-05	control-2
502	235	7.54575e-05	control-2
503	236	7.54575e-05	control-2
504	237	7.54575e-05	control-2
505	238	7.54575e-05	control-2
506	239	7.54575e-05	control-2
507	240	7.54575e-05	control-2
508	241	7.54575e-05	control-2
509	242	7.54575e-05	control-2
510	243	7.54575e-05	control-2
511	244	7.54575e-05	control-2
512	245	3.77287e-05	control-2
513	246	3.77287e-05	control-2
514	247	3.77287e-05	control-2
515	248	3.77287e-05	control-2
516	249	3.77287e-05	control-2
517	250	3.77287e-05	control-2
518	251	3.77287e-05	control-2
519	252	3.77287e-05	control-2
520	253	3.77287e-05	control-2
521	254	3.77287e-05	control-2
522	255	3.77287e-05	control-2
523	256	3.77287e-05	control-2
524	257	3.77287e-05	control-2
525	258	3.77287e-05	control-2
526	259	3.77287e-05	control-2
527	260	3.77287e-05	control-2
528	261	3.77287e-05	control-2
529	262	3.77287e-05	control-2
530	263	3.77287e-05	control-2
531	264	3.77287e-05	control-2
532	265	3.77287e-05	control-2
533	266	3.77287e-05	control-2
534	267	3.77287e-05	control-2
535	268	3.77287e-05	control-2
536	269	3.77287e-05	control-2
537	270	3.77287e-05	control-2
538	271	3.77287e-05	control-2
539	272	3.77287e-05	control-2
540	273	3.77287e-05	control-2
541	274	3.77287e-05	control-2
542	275	3.77287e-05	control-2
543	276	3.77287e-05	control-2
544	277	3.77287e-05	control-2
545	278	3.77287e-05	control-2
546	279	3.77287e-05	control-2
547	280	3.77287e-05	control-2
548	281	3.77287e-05	control-2
549	282	3.77287e-05	control-2
550	283	3.77287e-05	control-2
551	284	3.77287e-05	control-2
552	285	3.77287e-05	control-2
553	286	3.77287e-05	control-2
554	287	3.77287e-05	control-2
555	288	3.77287e-05	control-2
556	289	3.77287e-05	control-2
557	290	3.77287e-05	control-2
558	291	3.77287e-05	control-2
559	292	3.77287e-05	control-2
560	293	3.77287e-05	control-2
561	294	3.77287e-05	control-2
562	295	3.77287e-05	control-2
563	296	3.77287e-05	control-2
564	297	3.77287e-05	control-2
565	298	3.77287e-05	control-2
566	299	3.77287e-05	control-2
567	300	3.77287e-05	control-2
568	301	3.77287e-05	control-2
569	302	3.77287e-05	control-2
570	303	3.77287e-05	control-2
571	304	3.77287e-05	control-2
572	305	3.77287e-05	control-2
573	306	3.77287e-05	control-2
574	307	3.77287e-05	control-2
575	308	3.77287e-05	control-2
576	309	3.77287e-05	control-2
577	310	3.77287e-05	control-2
578	311	3.77287e-05	control-2
579	312	3.77287e-05	control-2
580	313	3.77287e-05	control-2
581	314	3.77287e-05	control-2
582	315	3.77287e-05	control-2
583	316	3.77287e-05	control-2
584	317	3.77287e-05	control-2
585	318	3.77287e-05	control-2
586	319	3.77287e-05	control-2
587	320	3.77287e-05	control-2
588	321	3.77287e-05	control-2
589	322	3.77287e-05	control-2
590	323	3.77287e-05	control-2
591	324	3.77287e-05	control-2
592	325	3.77287e-05	control-2
593	326	3.77287e-05	control-2
594	327	3.77287e-05	control-2
595	328	3.77287e-05	control-2
596	329	3.77287e-05	control-2
597	330	3.77287e-05	control-2
598	331	3.77287e-05	control-2
599	332	3.77287e-05	control-2
600	333	3.77287e-05	control-2
601	334	3.77287e-05	control-2
602	335	3.77287e-05	control-2
603	336	3.77287e-05	control-2
604	337	3.77287e-05	control-2
605	338	3.77287e-05	control-2
606	339	3.77287e-05	control-2
607	340	3.77287e-05	control-2
608	341	3.77287e-05	control-2
609	342	3.77287e-05	control-2
610	343	3.77287e-05	control-2
611	344	3.77287e-05	control-2
612	345	3.77287e-05	control-2
613	346	3.77287e-05	control-2
614	347	3.77287e-05	control-2
615	1	0.163894	control-3
616	2	0.15914	control-3
617	3	0.0697604	control-3
618	4	0.0636106	control-3
619	5	0.0550085	control-3
620	6	0.029202	control-3
621	7	0.0284852	control-3
622	8	0.0271647	control-3
623	9	0.0270515	control-3
624	10	0.0187889	control-3
625	11	0.0173929	control-3
626	12	0.0162234	control-3
627	13	0.0127146	control-3
628	14	0.0122241	control-3
629	15	0.01113	control-3
630	16	0.0104886	control-3
631	17	0.00924354	control-3
632	18	0.00731937	control-3
633	19	0.00686663	control-3
634	20	0.0065648	control-3
635	21	0.00626297	control-3
636	22	0.00626297	control-3
637	23	0.00596114	control-3
638	24	0.00573477	control-3
639	25	0.00550839	control-3
640	26	0.00516884	control-3
641	27	0.00516884	control-3
642	28	0.00509338	control-3
643	29	0.00505565	control-3
644	30	0.00486701	control-3
645	31	0.00467836	control-3
646	32	0.00437653	control-3
647	33	0.00403697	control-3
648	34	0.00403697	control-3
649	35	0.00373514	control-3
650	36	0.00365969	control-3
651	37	0.00339559	control-3
652	38	0.00335786	control-3
653	39	0.00335786	control-3
654	40	0.00316921	control-3
655	41	0.00313148	control-3
656	42	0.00309376	control-3
657	43	0.00309376	control-3
658	44	0.0030183	control-3
659	45	0.00294284	control-3
660	46	0.00282965	control-3
661	47	0.00279193	control-3
662	48	0.00279193	control-3
663	49	0.00271647	control-3
664	50	0.00271647	control-3
665	51	0.00260328	control-3
666	52	0.00260328	control-3
667	53	0.00252782	control-3
668	54	0.00241464	control-3
669	55	0.00226372	control-3
670	56	0.00215054	control-3
671	57	0.00211281	control-3
672	58	0.00196189	control-3
673	59	0.00188644	control-3
674	60	0.00188644	control-3
675	61	0.00184871	control-3
676	62	0.00169779	control-3
677	63	0.00166006	control-3
678	64	0.00158461	control-3
679	65	0.00158461	control-3
680	66	0.00143369	control-3
681	67	0.00143369	control-3
682	68	0.00139596	control-3
683	69	0.00135823	control-3
684	70	0.00128278	control-3
685	71	0.00124505	control-3
686	72	0.00120732	control-3
687	73	0.00120732	control-3
688	74	0.00116959	control-3
689	75	0.00109413	control-3
690	76	0.00109413	control-3
691	77	0.00109413	control-3
692	78	0.00109413	control-3
693	79	0.0010564	control-3
694	80	0.00101868	control-3
695	81	0.00101868	control-3
696	82	0.00101868	control-3
697	83	0.00101868	control-3
698	84	0.000980947	control-3
699	85	0.000980947	control-3
700	86	0.000980947	control-3
701	87	0.000943218	control-3
702	88	0.000943218	control-3
703	89	0.00090549	control-3
704	90	0.00090549	control-3
705	91	0.00090549	control-3
706	92	0.00090549	control-3
707	93	0.000867761	control-3
708	94	0.000867761	control-3
709	95	0.000830032	control-3
710	96	0.000830032	control-3
711	97	0.000754575	control-3
712	98	0.000754575	control-3
713	99	0.000754575	control-3
714	100	0.000716846	control-3
715	101	0.000716846	control-3
716	102	0.000716846	control-3
717	103	0.000716846	control-3
718	104	0.000679117	control-3
719	105	0.000641388	control-3
720	106	0.000641388	control-3
721	107	0.00060366	control-3
722	108	0.00060366	control-3
723	109	0.00060366	control-3
724	110	0.000565931	control-3
725	111	0.000565931	control-3
726	112	0.000565931	control-3
727	113	0.000565931	control-3
728	114	0.000528202	control-3
729	115	0.000528202	control-3
730	116	0.000528202	control-3
731	117	0.000528202	control-3
732	118	0.000490473	control-3
733	119	0.000490473	control-3
734	120	0.000490473	control-3
735	121	0.000490473	control-3
736	122	0.000452745	control-3
737	123	0.000452745	control-3
738	124	0.000452745	control-3
739	125	0.000452745	control-3
740	126	0.000415016	control-3
741	127	0.000415016	control-3
742	128	0.000415016	control-3
743	129	0.000415016	control-3
744	130	0.000415016	control-3
745	131	0.000415016	control-3
746	132	0.000415016	control-3
747	133	0.000415016	control-3
748	134	0.000415016	control-3
749	135	0.000415016	control-3
750	136	0.000415016	control-3
751	137	0.000377287	control-3
752	138	0.000377287	control-3
753	139	0.000377287	control-3
754	140	0.000377287	control-3
755	141	0.000339559	control-3
756	142	0.000339559	control-3
757	143	0.000339559	control-3
758	144	0.000339559	control-3
759	145	0.000339559	control-3
760	146	0.000339559	control-3
761	147	0.000339559	control-3
762	148	0.000339559	control-3
763	149	0.000339559	control-3
764	150	0.000339559	control-3
765	151	0.00030183	control-3
766	152	0.00030183	control-3
767	153	0.00030183	control-3
768	154	0.00030183	control-3
769	155	0.00030183	control-3
770	156	0.00030183	control-3
771	157	0.00030183	control-3
772	158	0.00030183	control-3
773	159	0.00030183	control-3
774	160	0.00030183	control-3
775	161	0.000264101	control-3
776	162	0.000264101	control-3
777	163	0.000264101	control-3
778	164	0.000264101	control-3
779	165	0.000264101	control-3
780	166	0.000264101	control-3
781	167	0.000264101	control-3
782	168	0.000264101	control-3
783	169	0.000264101	control-3
784	170	0.000264101	control-3
785	171	0.000264101	control-3
786	172	0.000226372	control-3
787	173	0.000226372	control-3
788	174	0.000226372	control-3
789	175	0.000226372	control-3
790	176	0.000226372	control-3
791	177	0.000226372	control-3
792	178	0.000226372	control-3
793	179	0.000226372	control-3
794	180	0.000226372	control-3
795	181	0.000226372	control-3
796	182	0.000226372	control-3
797	183	0.000226372	control-3
798	184	0.000226372	control-3
799	185	0.000226372	control-3
800	186	0.000188644	control-3
801	187	0.000188644	control-3
802	188	0.000188644	control-3
803	189	0.000188644	control-3
804	190	0.000188644	control-3
805	191	0.000188644	control-3
806	192	0.000188644	control-3
807	193	0.000188644	control-3
808	194	0.000188644	control-3
809	195	0.000188644	control-3
810	196	0.000188644	control-3
811	197	0.000188644	control-3
812	198	0.000188644	control-3
813	199	0.000188644	control-3
814	200	0.000188644	control-3
815	201	0.000188644	control-3
816	202	0.000188644	control-3
817	203	0.000188644	control-3
818	204	0.000188644	control-3
819	205	0.000188644	control-3
820	206	0.000188644	control-3
821	207	0.000188644	control-3
822	208	0.000188644	control-3
823	209	0.000150915	control-3
824	210	0.000150915	control-3
825	211	0.000150915	control-3
826	212	0.000150915	control-3
827	213	0.000150915	control-3
828	214	0.000150915	control-3
829	215	0.000150915	control-3
830	216	0.000150915	control-3
831	217	0.000150915	control-3
832	218	0.000150915	control-3
833	219	0.000150915	control-3
834	220	0.000150915	control-3
835	221	0.000150915	control-3
836	222	0.000150915	control-3
837	223	0.000150915	control-3
838	224	0.000150915	control-3
839	225	0.000150915	control-3
840	226	0.000150915	control-3
841	227	0.000150915	control-3
842	228	0.000150915	control-3
843	229	0.000150915	control-3
844	230	0.000150915	control-3
845	231	0.000150915	control-3
846	232	0.000150915	control-3
847	233	0.000150915	control-3
848	234	0.000113186	control-3
849	235	0.000113186	control-3
850	236	0.000113186	control-3
851	237	0.000113186	control-3
852	238	0.000113186	control-3
853	239	0.000113186	control-3
854	240	0.000113186	control-3
855	241	0.000113186	control-3
856	242	0.000113186	control-3
857	243	0.000113186	control-3
858	244	0.000113186	control-3
859	245	0.000113186	control-3
860	246	0.000113186	control-3
861	247	0.000113186	control-3
862	248	0.000113186	control-3
863	249	0.000113186	control-3
864	250	0.000113186	control-3
865	251	0.000113186	control-3
866	252	0.000113186	control-3
867	253	0.000113186	control-3
868	254	0.000113186	control-3
869	255	0.000113186	control-3
870	256	0.000113186	control-3
871	257	0.000113186	control-3
872	258	0.000113186	control-3
873	259	0.000113186	control-3
874	260	0.000113186	control-3
875	261	0.000113186	control-3
876	262	0.000113186	control-3
877	263	0.000113186	control-3
878	264	0.000113186	control-3
879	265	0.000113186	control-3
880	266	0.000113186	control-3
881	267	0.000113186	control-3
882	268	0.000113186	control-3
883	269	0.000113186	control-3
884	270	0.000113186	control-3
885	271	0.000113186	control-3
886	272	0.000113186	control-3
887	273	0.000113186	control-3
888	274	0.000113186	control-3
889	275	0.000113186	control-3
890	276	0.000113186	control-3
891	277	7.54575e-05	control-3
892	278	7.54575e-05	control-3
893	279	7.54575e-05	control-3
894	280	7.54575e-05	control-3
895	281	7.54575e-05	control-3
896	282	7.54575e-05	control-3
897	283	7.54575e-05	control-3
898	284	7.54575e-05	control-3
899	285	7.54575e-05	control-3
900	286	7.54575e-05	control-3
901	287	7.54575e-05	control-3
902	288	7.54575e-05	control-3
903	289	7.54575e-05	control-3
904	290	7.54575e-05	control-3
905	291	7.54575e-05	control-3
906	292	7.54575e-05	control-3
907	293	7.54575e-05	control-3
908	294	7.54575e-05	control-3
909	295	7.54575e-05	control-3
910	296	7.54575e-05	control-3
911	297	7.54575e-05	control-3
912	298	7.54575e-05	control-3
913	299	7.54575e-05	control-3
914	300	7.54575e-05	control-3
915	301	7.54575e-05	control-3
916	302	7.54575e-05	control-3
917	303	7.54575e-05	control-3
918	304	7.54575e-05	control-3
919	305	7.54575e-05	control-3
920	306	7.54575e-05	control-3
921	307	7.54575e-05	control-3
922	308	7.54575e-05	control-3
923	309	7.54575e-05	control-3
924	310	7.54575e-05	control-3
925	311	7.54575e-05	control-3
926	312	7.54575e-05	control-3
927	313	7.54575e-05	control-3
928	314	7.54575e-05	control-3
929	315	7.54575e-05	control-3
930	316	7.54575e-05	control-3
931	317	7.54575e-05	control-3
932	318	7.54575e-05	control-3
933	319	7.54575e-05	control-3
934	320	7.54575e-05	control-3
935	321	7.54575e-05	control-3
936	322	7.54575e-05	control-3
937	323	7.54575e-05	control-3
938	324	7.54575e-05	control-3
939	325	7.54575e-05	control-3
940	326	7.54575e-05	control-3
941	327	7.54575e-05	control-3
942	328	7.54575e-05	control-3
943	329	7.54575e-05	control-3
944	330	7.54575e-05	control-3
945	331	7.54575e-05	control-3
946	332	7.54575e-05	control-3
947	333	7.54575e-05	control-3
948	334	7.54575e-05	control-3
949	335	7.54575e-05	control-3
950	336	7.54575e-05	control-3
951	337	7.54575e-05	control-3
952	338	7.54575e-05	control-3
953	339	7.54575e-05	control-3
954	340	7.54575e-05	control-3
955	341	7.54575e-05	control-3
956	342	7.54575e-05	control-3
957	343	7.54575e-05	control-3
958	344	7.54575e-05	control-3
959	345	7.54575e-05	control-3
960	346	7.54575e-05	control-3
961	347	7.54575e-05	control-3
962	348	7.54575e-05	control-3
963	349	7.54575e-05	control-3
964	350	7.54575e-05	control-3
965	351	7.54575e-05	control-3
966	352	7.54575e-05	control-3
967	353	7.54575e-05	control-3
968	354	7.54575e-05	control-3
969	355	7.54575e-05	control-3
970	356	7.54575e-05	control-3
971	357	7.54575e-05	control-3
972	358	7.54575e-05	control-3
973	359	7.54575e-05	control-3
974	360	7.54575e-05	control-3
975	361	7.54575e-05	control-3
976	362	7.54575e-05	control-3
977	363	7.54575e-05	control-3
978	364	7.54575e-05	control-3
979	365	7.54575e-05	control-3
980	366	7.54575e-05	control-3
981	367	7.54575e-05	control-3
982	368	7.54575e-05	control-3
983	369	7.54575e-05	control-3
984	370	7.54575e-05	control-3
985	371	7.54575e-05	control-3
986	372	7.54575e-05	control-3
987	373	7.54575e-05	control-3
988	374	7.54575e-05	control-3
989	375	7.54575e-05	control-3
990	376	7.54575e-05	control-3
991	377	3.77287e-05	control-3
992	378	3.77287e-05	control-3
993	379	3.77287e-05	control-3
994	380	3.77287e-05	control-3
995	381	3.77287e-05	control-3
996	382	3.77287e-05	control-3
997	383	3.77287e-05	control-3
998	384	3.77287e-05	control-3
999	385	3.77287e-05	control-3
1000	386	3.77287e-05	control-3
1001	387	3.77287e-05	control-3
1002	388	3.77287e-05	control-3
1003	389	3.77287e-05	control-3
1004	390	3.77287e-05	control-3
1005	391	3.77287e-05	control-3
1006	392	3.77287e-05	control-3
1007	393	3.77287e-05	control-3
1008	394	3.77287e-05	control-3
1009	395	3.77287e-05	control-3
1010	396	3.77287e-05	control-3
1011	397	3.77287e-05	control-3
1012	398	3.77287e-05	control-3
1013	399	3.77287e-05	control-3
1014	400	3.77287e-05	control-3
1015	401	3.77287e-05	control-3
1016	402	3.77287e-05	control-3
1017	403	3.77287e-05	control-3
1018	404	3.77287e-05	control-3
1019	405	3.77287e-05	control-3
1020	406	3.77287e-05	control-3
1021	407	3.77287e-05	control-3
1022	408	3.77287e-05	control-3
1023	409	3.77287e-05	control-3
1024	410	3.77287e-05	control-3
1025	411	3.77287e-05	control-3
1026	412	3.77287e-05	control-3
1027	413	3.77287e-05	control-3
1028	414	3.77287e-05	control-3
1029	415	3.77287e-05	control-3
1030	416	3.77287e-05	control-3
1031	417	3.77287e-05	control-3
1032	418	3.77287e-05	control-3
1033	419	3.77287e-05	control-3
1034	420	3.77287e-05	control-3
1035	421	3.77287e-05	control-3
1036	422	3.77287e-05	control-3
1037	423	3.77287e-05	control-3
1038	424	3.77287e-05	control-3
1039	425	3.77287e-05	control-3
1040	426	3.77287e-05	control-3
1041	427	3.77287e-05	control-3
1042	428	3.77287e-05	control-3
1043	429	3.77287e-05	control-3
1044	430	3.77287e-05	control-3
1045	431	3.77287e-05	control-3
1046	432	3.77287e-05	control-3
1047	433	3.77287e-05	control-3
1048	434	3.77287e-05	control-3
1049	435	3.77287e-05	control-3
1050	436	3.77287e-05	control-3
1051	437	3.77287e-05	control-3
1052	438	3.77287e-05	control-3
1053	439	3.77287e-05	control-3
1054	440	3.77287e-05	control-3
1055	441	3.77287e-05	control-3
1056	442	3.77287e-05	control-3
1057	443	3.77287e-05	control-3
1058	444	3.77287e-05	control-3
1059	445	3.77287e-05	control-3
1060	446	3.77287e-05	control-3
1061	447	3.77287e-05	control-3
1062	448	3.77287e-05	control-3
1063	449	3.77287e-05	control-3
1064	450	3.77287e-05	control-3
1065	451	3.77287e-05	control-3
1066	452	3.77287e-05	control-3
1067	453	3.77287e-05	control-3
1068	454	3.77287e-05	control-3
1069	455	3.77287e-05	control-3
1070	456	3.77287e-05	control-3
1071	457	3.77287e-05	control-3
1072	458	3.77287e-05	control-3
1073	459	3.77287e-05	control-3
1074	460	3.77287e-05	control-3
1075	461	3.77287e-05	control-3
1076	462	3.77287e-05	control-3
1077	463	3.77287e-05	control-3
1078	464	3.77287e-05	control-3
1079	465	3.77287e-05	control-3
1080	466	3.77287e-05	control-3
1081	467	3.77287e-05	control-3
1082	468	3.77287e-05	control-3
1083	469	3.77287e-05	control-3
1084	470	3.77287e-05	control-3
1085	471	3.77287e-05	control-3
1086	472	3.77287e-05	control-3
1087	473	3.77287e-05	control-3
1088	474	3.77287e-05	control-3
1089	475	3.77287e-05	control-3
1090	476	3.77287e-05	control-3
1091	477	3.77287e-05	control-3
1092	478	3.77287e-05	control-3
1093	479	3.77287e-05	control-3
1094	480	3.77287e-05	control-3
1095	481	3.77287e-05	control-3
1096	482	3.77287e-05	control-3
1097	483	3.77287e-05	control-3
1098	484	3.77287e-05	control-3
1099	485	3.77287e-05	control-3
1100	486	3.77287e-05	control-3
1101	487	3.77287e-05	control-3
1102	488	3.77287e-05	control-3
1103	489	3.77287e-05	control-3
1104	490	3.77287e-05	control-3
1105	491	3.77287e-05	control-3
1106	492	3.77287e-05	control-3
1107	493	3.77287e-05	control-3
1108	494	3.77287e-05	control-3
1109	495	3.77287e-05	control-3
1110	496	3.77287e-05	control-3
1111	497	3.77287e-05	control-3
1112	498	3.77287e-05	control-3
1113	499	3.77287e-05	control-3
1114	500	3.77287e-05	control-3
1115	501	3.77287e-05	control-3
1116	502	3.77287e-05	control-3
1117	503	3.77287e-05	control-3
1118	504	3.77287e-05	control-3
1119	505	3.77287e-05	control-3
1120	506	3.77287e-05	control-3
1121	507	3.77287e-05	control-3
1122	508	3.77287e-05	control-3
1123	509	3.77287e-05	control-3
1124	510	3.77287e-05	control-3
1125	511	3.77287e-05	control-3
1126	512	3.77287e-05	control-3
1127	513	3.77287e-05	control-3
1128	514	3.77287e-05	control-3
1129	515	3.77287e-05	control-3
1130	516	3.77287e-05	control-3
1131	517	3.77287e-05	control-3
1132	518	3.77287e-05	control-3
1133	519	3.77287e-05	control-3
1134	520	3.77287e-05	control-3
1135	521	3.77287e-05	control-3
1136	522	3.77287e-05	control-3
1137	523	3.77287e-05	control-3
1138	524	3.77287e-05	control-3
1139	525	3.77287e-05	control-3
1140	526	3.77287e-05	control-3
1141	527	3.77287e-05	control-3
1142	1	0.125108	control-4
1143	2	0.101264	control-4
1144	3	0.0834182	control-4
1145	4	0.0576872	control-4
1146	5	0.0545935	control-4
1147	6	0.0462177	control-4
1148	7	0.0449349	control-4
1149	8	0.0338804	control-4
1150	9	0.0278815	control-4
1151	10	0.0257687	control-4
1152	11	0.0255801	control-4
1153	12	0.0171666	control-4
1154	13	0.0158083	control-4
1155	14	0.0143746	control-4
1156	15	0.0136201	control-4
1157	16	0.0133937	control-4
1158	17	0.012941	control-4
1159	18	0.0128655	control-4
1160	19	0.0115073	control-4
1161	20	0.0112432	control-4
1162	21	0.00977174	control-4
1163	22	0.00747029	control-4
1164	23	0.00716846	control-4
1165	24	0.00697982	control-4
1166	25	0.00694209	control-4
1167	26	0.00690436	control-4
1168	27	0.00679117	control-4
1169	28	0.00614978	control-4
1170	29	0.00614978	control-4
1171	30	0.00581022	control-4
1172	31	0.00547067	control-4
1173	32	0.00528202	control-4
1174	33	0.00490473	control-4
1175	34	0.00467836	control-4
1176	35	0.00452745	control-4
1177	36	0.00437653	control-4
1178	37	0.00430108	control-4
1179	38	0.00422562	control-4
1180	39	0.00403697	control-4
1181	40	0.00388606	control-4
1182	41	0.0038106	control-4
1183	42	0.00313148	control-4
1184	43	0.00305603	control-4
1185	44	0.00305603	control-4
1186	45	0.0030183	control-4
1187	46	0.00256555	control-4
1188	47	0.0024901	control-4
1189	48	0.00233918	control-4
1190	49	0.00207508	control-4
1191	50	0.00207508	control-4
1192	51	0.00203735	control-4
1193	52	0.00203735	control-4
1194	53	0.00203735	control-4
1195	54	0.00188644	control-4
1196	55	0.00177325	control-4
1197	56	0.00173552	control-4
1198	57	0.00166006	control-4
1199	58	0.00166006	control-4
1200	59	0.00158461	control-4
1201	60	0.00158461	control-4
1202	61	0.00154688	control-4
1203	62	0.00154688	control-4
1204	63	0.00150915	control-4
1205	64	0.00150915	control-4
1206	65	0.00147142	control-4
1207	66	0.00143369	control-4
1208	67	0.00143369	control-4
1209	68	0.00139596	control-4
1210	69	0.00139596	control-4
1211	70	0.00135823	control-4
1212	71	0.00132051	control-4
1213	72	0.00124505	control-4
1214	73	0.00124505	control-4
1215	74	0.00124505	control-4
1216	75	0.00120732	control-4
1217	76	0.00116959	control-4
1218	77	0.00113186	control-4
1219	78	0.00113186	control-4
1220	79	0.00109413	control-4
1221	80	0.00101868	control-4
1222	81	0.00101868	control-4
1223	82	0.00101868	control-4
1224	83	0.00101868	control-4
1225	84	0.00101868	control-4
1226	85	0.000980947	control-4
1227	86	0.000943218	control-4
1228	87	0.00090549	control-4
1229	88	0.00090549	control-4
1230	89	0.000867761	control-4
1231	90	0.000867761	control-4
1232	91	0.000867761	control-4
1233	92	0.000830032	control-4
1234	93	0.000830032	control-4
1235	94	0.000792303	control-4
1236	95	0.000792303	control-4
1237	96	0.000754575	control-4
1238	97	0.000754575	control-4
1239	98	0.000754575	control-4
1240	99	0.000716846	control-4
1241	100	0.000679117	control-4
1242	101	0.000679117	control-4
1243	102	0.000641388	control-4
1244	103	0.000641388	control-4
1245	104	0.000641388	control-4
1246	105	0.000641388	control-4
1247	106	0.000641388	control-4
1248	107	0.00060366	control-4
1249	108	0.000565931	control-4
1250	109	0.000565931	control-4
1251	110	0.000565931	control-4
1252	111	0.000490473	control-4
1253	112	0.000490473	control-4
1254	113	0.000490473	control-4
1255	114	0.000452745	control-4
1256	115	0.000452745	control-4
1257	116	0.000452745	control-4
1258	117	0.000452745	control-4
1259	118	0.000415016	control-4
1260	119	0.000415016	control-4
1261	120	0.000415016	control-4
1262	121	0.000377287	control-4
1263	122	0.000377287	control-4
1264	123	0.000339559	control-4
1265	124	0.000339559	control-4
1266	125	0.000339559	control-4
1267	126	0.000339559	control-4
1268	127	0.000339559	control-4
1269	128	0.00030183	control-4
1270	129	0.00030183	control-4
1271	130	0.00030183	control-4
1272	131	0.00030183	control-4
1273	132	0.00030183	control-4
1274	133	0.00030183	control-4
1275	134	0.00030183	control-4
1276	135	0.00030183	control-4
1277	136	0.00030183	control-4
1278	137	0.00030183	control-4
1279	138	0.00030183	control-4
1280	139	0.00030183	control-4
1281	140	0.000264101	control-4
1282	141	0.000264101	control-4
1283	142	0.000264101	control-4
1284	143	0.000264101	control-4
1285	144	0.000264101	control-4
1286	145	0.000264101	control-4
1287	146	0.000264101	control-4
1288	147	0.000226372	control-4
1289	148	0.000226372	control-4
1290	149	0.000226372	control-4
1291	150	0.000226372	control-4
1292	151	0.000226372	control-4
1293	152	0.000226372	control-4
1294	153	0.000226372	control-4
1295	154	0.000226372	control-4
1296	155	0.000226372	control-4
1297	156	0.000226372	control-4
1298	157	0.000188644	control-4
1299	158	0.000188644	control-4
1300	159	0.000188644	control-4
1301	160	0.000188644	control-4
1302	161	0.000188644	control-4
1303	162	0.000188644	control-4
1304	163	0.000188644	control-4
1305	164	0.000188644	control-4
1306	165	0.000188644	control-4
1307	166	0.000188644	control-4
1308	167	0.000188644	control-4
1309	168	0.000188644	control-4
1310	169	0.000188644	control-4
1311	170	0.000188644	control-4
1312	171	0.000188644	control-4
1313	172	0.000188644	control-4
1314	173	0.000188644	control-4
1315	174	0.000188644	control-4
1316	175	0.000188644	control-4
1317	176	0.000188644	control-4
1318	177	0.000188644	control-4
1319	178	0.000188644	control-4
1320	179	0.000150915	control-4
1321	180	0.000150915	control-4
1322	181	0.000150915	control-4
1323	182	0.000150915	control-4
1324	183	0.000150915	control-4
1325	184	0.000150915	control-4
1326	185	0.000150915	control-4
1327	186	0.000150915	control-4
1328	187	0.000150915	control-4
1329	188	0.000150915	control-4
1330	189	0.000150915	control-4
1331	190	0.000150915	control-4
1332	191	0.000150915	control-4
1333	192	0.000150915	control-4
1334	193	0.000150915	control-4
1335	194	0.000150915	control-4
1336	195	0.000150915	control-4
1337	196	0.000150915	control-4
1338	197	0.000150915	control-4
1339	198	0.000150915	control-4
1340	199	0.000150915	control-4
1341	200	0.000150915	control-4
1342	201	0.000150915	control-4
1343	202	0.000150915	control-4
1344	203	0.000150915	control-4
1345	204	0.000150915	control-4
1346	205	0.000150915	control-4
1347	206	0.000150915	control-4
1348	207	0.000150915	control-4
1349	208	0.000150915	control-4
1350	209	0.000150915	control-4
1351	210	0.000113186	control-4
1352	211	0.000113186	control-4
1353	212	0.000113186	control-4
1354	213	0.000113186	control-4
1355	214	0.000113186	control-4
1356	215	0.000113186	control-4
1357	216	0.000113186	control-4
1358	217	0.000113186	control-4
1359	218	0.000113186	control-4
1360	219	0.000113186	control-4
1361	220	0.000113186	control-4
1362	221	0.000113186	control-4
1363	222	0.000113186	control-4
1364	223	0.000113186	control-4
1365	224	0.000113186	control-4
1366	225	0.000113186	control-4
1367	226	0.000113186	control-4
1368	227	0.000113186	control-4
1369	228	0.000113186	control-4
1370	229	0.000113186	control-4
1371	230	0.000113186	control-4
1372	231	0.000113186	control-4
1373	232	0.000113186	control-4
1374	233	0.000113186	control-4
1375	234	0.000113186	control-4
1376	235	0.000113186	control-4
1377	236	0.000113186	control-4
1378	237	0.000113186	control-4
1379	238	0.000113186	control-4
1380	239	0.000113186	control-4
1381	240	0.000113186	control-4
1382	241	0.000113186	control-4
1383	242	0.000113186	control-4
1384	243	0.000113186	control-4
1385	244	0.000113186	control-4
1386	245	0.000113186	control-4
1387	246	0.000113186	control-4
1388	247	0.000113186	control-4
1389	248	0.000113186	control-4
1390	249	0.000113186	control-4
1391	250	0.000113186	control-4
1392	251	0.000113186	control-4
1393	252	0.000113186	control-4
1394	253	0.000113186	control-4
1395	254	0.000113186	control-4
1396	255	0.000113186	control-4
1397	256	0.000113186	control-4
1398	257	7.54575e-05	control-4
1399	258	7.54575e-05	control-4
1400	259	7.54575e-05	control-4
1401	260	7.54575e-05	control-4
1402	261	7.54575e-05	control-4
1403	262	7.54575e-05	control-4
1404	263	7.54575e-05	control-4
1405	264	7.54575e-05	control-4
1406	265	7.54575e-05	control-4
1407	266	7.54575e-05	control-4
1408	267	7.54575e-05	control-4
1409	268	7.54575e-05	control-4
1410	269	7.54575e-05	control-4
1411	270	7.54575e-05	control-4
1412	271	7.54575e-05	control-4
1413	272	7.54575e-05	control-4
1414	273	7.54575e-05	control-4
1415	274	7.54575e-05	control-4
1416	275	7.54575e-05	control-4
1417	276	7.54575e-05	control-4
1418	277	7.54575e-05	control-4
1419	278	7.54575e-05	control-4
1420	279	7.54575e-05	control-4
1421	280	7.54575e-05	control-4
1422	281	7.54575e-05	control-4
1423	282	7.54575e-05	control-4
1424	283	7.54575e-05	control-4
1425	284	7.54575e-05	control-4
1426	285	7.54575e-05	control-4
1427	286	7.54575e-05	control-4
1428	287	7.54575e-05	control-4
1429	288	7.54575e-05	control-4
1430	289	7.54575e-05	control-4
1431	290	7.54575e-05	control-4
1432	291	7.54575e-05	control-4
1433	292	7.54575e-05	control-4
1434	293	7.54575e-05	control-4
1435	294	7.54575e-05	control-4
1436	295	7.54575e-05	control-4
1437	296	7.54575e-05	control-4
1438	297	7.54575e-05	control-4
1439	298	7.54575e-05	control-4
1440	299	7.54575e-05	control-4
1441	300	7.54575e-05	control-4
1442	301	7.54575e-05	control-4
1443	302	7.54575e-05	control-4
1444	303	7.54575e-05	control-4
1445	304	7.54575e-05	control-4
1446	305	7.54575e-05	control-4
1447	306	7.54575e-05	control-4
1448	307	7.54575e-05	control-4
1449	308	7.54575e-05	control-4
1450	309	7.54575e-05	control-4
1451	310	7.54575e-05	control-4
1452	311	7.54575e-05	control-4
1453	312	7.54575e-05	control-4
1454	313	7.54575e-05	control-4
1455	314	7.54575e-05	control-4
1456	315	7.54575e-05	control-4
1457	316	7.54575e-05	control-4
1458	317	7.54575e-05	control-4
1459	318	7.54575e-05	control-4
1460	319	7.54575e-05	control-4
1461	320	3.77287e-05	control-4
1462	321	3.77287e-05	control-4
1463	322	3.77287e-05	control-4
1464	323	3.77287e-05	control-4
1465	324	3.77287e-05	control-4
1466	325	3.77287e-05	control-4
1467	326	3.77287e-05	control-4
1468	327	3.77287e-05	control-4
1469	328	3.77287e-05	control-4
1470	329	3.77287e-05	control-4
1471	330	3.77287e-05	control-4
1472	331	3.77287e-05	control-4
1473	332	3.77287e-05	control-4
1474	333	3.77287e-05	control-4
1475	334	3.77287e-05	control-4
1476	335	3.77287e-05	control-4
1477	336	3.77287e-05	control-4
1478	337	3.77287e-05	control-4
1479	338	3.77287e-05	control-4
1480	339	3.77287e-05	control-4
1481	340	3.77287e-05	control-4
1482	341	3.77287e-05	control-4
1483	342	3.77287e-05	control-4
1484	343	3.77287e-05	control-4
1485	344	3.77287e-05	control-4
1486	345	3.77287e-05	control-4
1487	346	3.77287e-05	control-4
1488	347	3.77287e-05	control-4
1489	348	3.77287e-05	control-4
1490	349	3.77287e-05	control-4
1491	350	3.77287e-05	control-4
1492	351	3.77287e-05	control-4
1493	352	3.77287e-05	control-4
1494	353	3.77287e-05	control-4
1495	354	3.77287e-05	control-4
1496	355	3.77287e-05	control-4
1497	356	3.77287e-05	control-4
1498	357	3.77287e-05	control-4
1499	358	3.77287e-05	control-4
1500	359	3.77287e-05	control-4
1501	360	3.77287e-05	control-4
1502	361	3.77287e-05	control-4
1503	362	3.77287e-05	control-4
1504	363	3.77287e-05	control-4
1505	364	3.77287e-05	control-4
1506	365	3.77287e-05	control-4
1507	366	3.77287e-05	control-4
1508	367	3.77287e-05	control-4
1509	368	3.77287e-05	control-4
1510	369	3.77287e-05	control-4
1511	370	3.77287e-05	control-4
1512	371	3.77287e-05	control-4
1513	372	3.77287e-05	control-4
1514	373	3.77287e-05	control-4
1515	374	3.77287e-05	control-4
1516	375	3.77287e-05	control-4
1517	376	3.77287e-05	control-4
1518	377	3.77287e-05	control-4
1519	378	3.77287e-05	control-4
1520	379	3.77287e-05	control-4
1521	380	3.77287e-05	control-4
1522	381	3.77287e-05	control-4
1523	382	3.77287e-05	control-4
1524	383	3.77287e-05	control-4
1525	384	3.77287e-05	control-4
1526	385	3.77287e-05	control-4
1527	386	3.77287e-05	control-4
1528	387	3.77287e-05	control-4
1529	388	3.77287e-05	control-4
1530	389	3.77287e-05	control-4
1531	390	3.77287e-05	control-4
1532	391	3.77287e-05	control-4
1533	392	3.77287e-05	control-4
1534	393	3.77287e-05	control-4
1535	394	3.77287e-05	control-4
1536	395	3.77287e-05	control-4
1537	396	3.77287e-05	control-4
1538	397	3.77287e-05	control-4
1539	398	3.77287e-05	control-4
1540	399	3.77287e-05	control-4
1541	400	3.77287e-05	control-4
1542	401	3.77287e-05	control-4
1543	402	3.77287e-05	control-4
1544	403	3.77287e-05	control-4
1545	404	3.77287e-05	control-4
1546	405	3.77287e-05	control-4
1547	406	3.77287e-05	control-4
1548	407	3.77287e-05	control-4
1549	408	3.77287e-05	control-4
1550	409	3.77287e-05	control-4
1551	410	3.77287e-05	control-4
1552	411	3.77287e-05	control-4
1553	412	3.77287e-05	control-4
1554	413	3.77287e-05	control-4
1555	414	3.77287e-05	control-4
1556	415	3.77287e-05	control-4
1557	416	3.77287e-05	control-4
1558	417	3.77287e-05	control-4
1559	418	3.77287e-05	control-4
1560	419	3.77287e-05	control-4
1561	420	3.77287e-05	control-4
1562	421	3.77287e-05	control-4
1563	422	3.77287e-05	control-4
1564	423	3.77287e-05	control-4
1565	424	3.77287e-05	control-4
1566	425	3.77287e-05	control-4
1567	426	3.77287e-05	control-4
1568	427	3.77287e-05	control-4
1569	428	3.77287e-05	control-4
1570	429	3.77287e-05	control-4
1571	430	3.77287e-05	control-4
1572	431	3.77287e-05	control-4
1573	432	3.77287e-05	control-4
1574	433	3.77287e-05	control-4
1575	434	3.77287e-05	control-4
1576	435	3.77287e-05	control-4
1577	436	3.77287e-05	control-4
1578	437	3.77287e-05	control-4
1579	438	3.77287e-05	control-4
1580	439	3.77287e-05	control-4
1581	440	3.77287e-05	control-4
1582	441	3.77287e-05	control-4
1583	442	3.77287e-05	control-4
1584	443	3.77287e-05	control-4
1585	444	3.77287e-05	control-4
1586	445	3.77287e-05	control-4
1587	446	3.77287e-05	control-4
1588	447	3.77287e-05	control-4
1589	448	3.77287e-05	control-4
1590	449	3.77287e-05	control-4
1591	450	3.77287e-05	control-4
1592	451	3.77287e-05	control-4
1593	452	3.77287e-05	control-4
1594	453	3.77287e-05	control-4
1595	454	3.77287e-05	control-4
1596	455	3.77287e-05	control-4
1597	456	3.77287e-05	control-4
1598	457	3.77287e-05	control-4
1599	458	3.77287e-05	control-4
1600	459	3.77287e-05	control-4
1601	460	3.77287e-05	control-4
1602	461	3.77287e-05	control-4
1603	462	3.77287e-05	control-4
1604	463	3.77287e-05	control-4
1605	464	3.77287e-05	control-4
1606	465	3.77287e-05	control-4
1607	466	3.77287e-05	control-4
1608	467	3.77287e-05	control-4
1609	468	3.77287e-05	control-4
1610	469	3.77287e-05	control-4
1611	470	3.77287e-05	control-4
1612	471	3.77287e-05	control-4
1613	472	3.77287e-05	control-4
1614	1	0.19502	control-5
1615	2	0.0774194	control-5
1616	3	0.0616487	control-5
1617	4	0.0609696	control-5
1618	5	0.0272779	control-5
1619	6	0.0256933	control-5
1620	7	0.0252028	control-5
1621	8	0.0246746	control-5
1622	9	0.0229768	control-5
1623	10	0.0221468	control-5
1624	11	0.0221468	control-5
1625	12	0.0209394	control-5
1626	13	0.0203735	control-5
1627	14	0.016827	control-5
1628	15	0.0150915	control-5
1629	16	0.0144124	control-5
1630	17	0.0138087	control-5
1631	18	0.0116204	control-5
1632	19	0.0113563	control-5
1633	20	0.0106772	control-5
1634	21	0.0106018	control-5
1635	22	0.0103377	control-5
1636	23	0.0101868	control-5
1637	24	0.00992266	control-5
1638	25	0.00962083	control-5
1639	26	0.009319	control-5
1640	27	0.00811168	control-5
1641	28	0.00747029	control-5
1642	29	0.00713073	control-5
1643	30	0.00697982	control-5
1644	31	0.00664026	control-5
1645	32	0.0060366	control-5
1646	33	0.00592341	control-5
1647	34	0.00588568	control-5
1648	35	0.00554612	control-5
1649	36	0.00547067	control-5
1650	37	0.00524429	control-5
1651	38	0.00501792	control-5
1652	39	0.00490473	control-5
1653	40	0.00464063	control-5
1654	41	0.00441426	control-5
1655	42	0.00426335	control-5
1656	43	0.00392379	control-5
1657	44	0.00392379	control-5
1658	45	0.00369742	control-5
1659	46	0.00347104	control-5
1660	47	0.00324467	control-5
1661	48	0.00260328	control-5
1662	49	0.00252782	control-5
1663	50	0.0024901	control-5
1664	51	0.00245237	control-5
1665	52	0.00237691	control-5
1666	53	0.00226372	control-5
1667	54	0.00211281	control-5
1668	55	0.00199962	control-5
1669	56	0.00188644	control-5
1670	57	0.00184871	control-5
1671	58	0.00181098	control-5
1672	59	0.00177325	control-5
1673	60	0.00169779	control-5
1674	61	0.00166006	control-5
1675	62	0.00162234	control-5
1676	63	0.00158461	control-5
1677	64	0.00158461	control-5
1678	65	0.00154688	control-5
1679	66	0.00154688	control-5
1680	67	0.00154688	control-5
1681	68	0.00150915	control-5
1682	69	0.00150915	control-5
1683	70	0.00150915	control-5
1684	71	0.00143369	control-5
1685	72	0.00135823	control-5
1686	73	0.00124505	control-5
1687	74	0.00124505	control-5
1688	75	0.00120732	control-5
1689	76	0.00109413	control-5
1690	77	0.0010564	control-5
1691	78	0.0010564	control-5
1692	79	0.0010564	control-5
1693	80	0.000943218	control-5
1694	81	0.00090549	control-5
1695	82	0.000867761	control-5
1696	83	0.000867761	control-5
1697	84	0.000867761	control-5
1698	85	0.000867761	control-5
1699	86	0.000830032	control-5
1700	87	0.000830032	control-5
1701	88	0.000754575	control-5
1702	89	0.000754575	control-5
1703	90	0.000716846	control-5
1704	91	0.000716846	control-5
1705	92	0.000679117	control-5
1706	93	0.000679117	control-5
1707	94	0.000641388	control-5
1708	95	0.000641388	control-5
1709	96	0.000641388	control-5
1710	97	0.000641388	control-5
1711	98	0.00060366	control-5
1712	99	0.00060366	control-5
1713	100	0.00060366	control-5
1714	101	0.00060366	control-5
1715	102	0.000565931	control-5
1716	103	0.000565931	control-5
1717	104	0.000565931	control-5
1718	105	0.000565931	control-5
1719	106	0.000528202	control-5
1720	107	0.000528202	control-5
1721	108	0.000528202	control-5
1722	109	0.000528202	control-5
1723	110	0.000528202	control-5
1724	111	0.000490473	control-5
1725	112	0.000490473	control-5
1726	113	0.000490473	control-5
1727	114	0.000490473	control-5
1728	115	0.000490473	control-5
1729	116	0.000490473	control-5
1730	117	0.000490473	control-5
1731	118	0.000452745	control-5
1732	119	0.000452745	control-5
1733	120	0.000452745	control-5
1734	121	0.000415016	control-5
1735	122	0.000415016	control-5
1736	123	0.000415016	control-5
1737	124	0.000415016	control-5
1738	125	0.000377287	control-5
1739	126	0.000377287	control-5
1740	127	0.000377287	control-5
1741	128	0.000377287	control-5
1742	129	0.000377287	control-5
1743	130	0.000377287	control-5
1744	131	0.000377287	control-5
1745	132	0.000377287	control-5
1746	133	0.000377287	control-5
1747	134	0.000377287	control-5
1748	135	0.000339559	control-5
1749	136	0.000339559	control-5
1750	137	0.000339559	control-5
1751	138	0.000339559	control-5
1752	139	0.000339559	control-5
1753	140	0.000339559	control-5
1754	141	0.000339559	control-5
1755	142	0.000339559	control-5
1756	143	0.000339559	control-5
1757	144	0.00030183	control-5
1758	145	0.00030183	control-5
1759	146	0.00030183	control-5
1760	147	0.00030183	control-5
1761	148	0.00030183	control-5
1762	149	0.00030183	control-5
1763	150	0.00030183	control-5
1764	151	0.00030183	control-5
1765	152	0.00030183	control-5
1766	153	0.00030183	control-5
1767	154	0.00030183	control-5
1768	155	0.00030183	control-5
1769	156	0.00030183	control-5
1770	157	0.00030183	control-5
1771	158	0.000264101	control-5
1772	159	0.000264101	control-5
1773	160	0.000264101	control-5
1774	161	0.000264101	control-5
1775	162	0.000264101	control-5
1776	163	0.000264101	control-5
1777	164	0.000264101	control-5
1778	165	0.000264101	control-5
1779	166	0.000264101	control-5
1780	167	0.000264101	control-5
1781	168	0.000264101	control-5
1782	169	0.000226372	control-5
1783	170	0.000226372	control-5
1784	171	0.000226372	control-5
1785	172	0.000226372	control-5
1786	173	0.000226372	control-5
1787	174	0.000226372	control-5
1788	175	0.000226372	control-5
1789	176	0.000226372	control-5
1790	177	0.000226372	control-5
1791	178	0.000226372	control-5
1792	179	0.000226372	control-5
1793	180	0.000226372	control-5
1794	181	0.000226372	control-5
1795	182	0.000226372	control-5
1796	183	0.000226372	control-5
1797	184	0.000226372	control-5
1798	185	0.000226372	control-5
1799	186	0.000188644	control-5
1800	187	0.000188644	control-5
1801	188	0.000188644	control-5
1802	189	0.000188644	control-5
1803	190	0.000188644	control-5
1804	191	0.000188644	control-5
1805	192	0.000188644	control-5
1806	193	0.000188644	control-5
1807	194	0.000188644	control-5
1808	195	0.000188644	control-5
1809	196	0.000188644	control-5
1810	197	0.000188644	control-5
1811	198	0.000188644	control-5
1812	199	0.000188644	control-5
1813	200	0.000188644	control-5
1814	201	0.000188644	control-5
1815	202	0.000188644	control-5
1816	203	0.000188644	control-5
1817	204	0.000188644	control-5
1818	205	0.000150915	control-5
1819	206	0.000150915	control-5
1820	207	0.000150915	control-5
1821	208	0.000150915	control-5
1822	209	0.000150915	control-5
1823	210	0.000150915	control-5
1824	211	0.000150915	control-5
1825	212	0.000150915	control-5
1826	213	0.000150915	control-5
1827	214	0.000150915	control-5
1828	215	0.000150915	control-5
1829	216	0.000150915	control-5
1830	217	0.000150915	control-5
1831	218	0.000150915	control-5
1832	219	0.000150915	control-5
1833	220	0.000150915	control-5
1834	221	0.000150915	control-5
1835	222	0.000150915	control-5
1836	223	0.000150915	control-5
1837	224	0.000150915	control-5
1838	225	0.000150915	control-5
1839	226	0.000150915	control-5
1840	227	0.000150915	control-5
1841	228	0.000150915	control-5
1842	229	0.000150915	control-5
1843	230	0.000150915	control-5
1844	231	0.000150915	control-5
1845	232	0.000150915	control-5
1846	233	0.000150915	control-5
1847	234	0.000150915	control-5
1848	235	0.000150915	control-5
1849	236	0.000150915	control-5
1850	237	0.000150915	control-5
1851	238	0.000150915	control-5
1852	239	0.000150915	control-5
1853	240	0.000150915	control-5
1854	241	0.000150915	control-5
1855	242	0.000150915	control-5
1856	243	0.000113186	control-5
1857	244	0.000113186	control-5
1858	245	0.000113186	control-5
1859	246	0.000113186	control-5
1860	247	0.000113186	control-5
1861	248	0.000113186	control-5
1862	249	0.000113186	control-5
1863	250	0.000113186	control-5
1864	251	0.000113186	control-5
1865	252	0.000113186	control-5
1866	253	0.000113186	control-5
1867	254	0.000113186	control-5
1868	255	0.000113186	control-5
1869	256	0.000113186	control-5
1870	257	0.000113186	control-5
1871	258	0.000113186	control-5
1872	259	0.000113186	control-5
1873	260	0.000113186	control-5
1874	261	0.000113186	control-5
1875	262	0.000113186	control-5
1876	263	0.000113186	control-5
1877	264	0.000113186	control-5
1878	265	0.000113186	control-5
1879	266	0.000113186	control-5
1880	267	0.000113186	control-5
1881	268	0.000113186	control-5
1882	269	0.000113186	control-5
1883	270	0.000113186	control-5
1884	271	0.000113186	control-5
1885	272	0.000113186	control-5
1886	273	0.000113186	control-5
1887	274	0.000113186	control-5
1888	275	0.000113186	control-5
1889	276	0.000113186	control-5
1890	277	0.000113186	control-5
1891	278	0.000113186	control-5
1892	279	0.000113186	control-5
1893	280	0.000113186	control-5
1894	281	0.000113186	control-5
1895	282	0.000113186	control-5
1896	283	0.000113186	control-5
1897	284	0.000113186	control-5
1898	285	0.000113186	control-5
1899	286	0.000113186	control-5
1900	287	0.000113186	control-5
1901	288	0.000113186	control-5
1902	289	7.54575e-05	control-5
1903	290	7.54575e-05	control-5
1904	291	7.54575e-05	control-5
1905	292	7.54575e-05	control-5
1906	293	7.54575e-05	control-5
1907	294	7.54575e-05	control-5
1908	295	7.54575e-05	control-5
1909	296	7.54575e-05	control-5
1910	297	7.54575e-05	control-5
1911	298	7.54575e-05	control-5
1912	299	7.54575e-05	control-5
1913	300	7.54575e-05	control-5
1914	301	7.54575e-05	control-5
1915	302	7.54575e-05	control-5
1916	303	7.54575e-05	control-5
1917	304	7.54575e-05	control-5
1918	305	7.54575e-05	control-5
1919	306	7.54575e-05	control-5
1920	307	7.54575e-05	control-5
1921	308	7.54575e-05	control-5
1922	309	7.54575e-05	control-5
1923	310	7.54575e-05	control-5
1924	311	7.54575e-05	control-5
1925	312	7.54575e-05	control-5
1926	313	7.54575e-05	control-5
1927	314	7.54575e-05	control-5
1928	315	7.54575e-05	control-5
1929	316	7.54575e-05	control-5
1930	317	7.54575e-05	control-5
1931	318	7.54575e-05	control-5
1932	319	7.54575e-05	control-5
1933	320	7.54575e-05	control-5
1934	321	7.54575e-05	control-5
1935	322	7.54575e-05	control-5
1936	323	7.54575e-05	control-5
1937	324	7.54575e-05	control-5
1938	325	7.54575e-05	control-5
1939	326	7.54575e-05	control-5
1940	327	7.54575e-05	control-5
1941	328	7.54575e-05	control-5
1942	329	7.54575e-05	control-5
1943	330	7.54575e-05	control-5
1944	331	7.54575e-05	control-5
1945	332	7.54575e-05	control-5
1946	333	7.54575e-05	control-5
1947	334	7.54575e-05	control-5
1948	335	7.54575e-05	control-5
1949	336	7.54575e-05	control-5
1950	337	7.54575e-05	control-5
1951	338	7.54575e-05	control-5
1952	339	7.54575e-05	control-5
1953	340	7.54575e-05	control-5
1954	341	7.54575e-05	control-5
1955	342	7.54575e-05	control-5
1956	343	7.54575e-05	control-5
1957	344	7.54575e-05	control-5
1958	345	7.54575e-05	control-5
1959	346	7.54575e-05	control-5
1960	347	7.54575e-05	control-5
1961	348	7.54575e-05	control-5
1962	349	7.54575e-05	control-5
1963	350	7.54575e-05	control-5
1964	351	7.54575e-05	control-5
1965	352	7.54575e-05	control-5
1966	353	7.54575e-05	control-5
1967	354	7.54575e-05	control-5
1968	355	7.54575e-05	control-5
1969	356	7.54575e-05	control-5
1970	357	7.54575e-05	control-5
1971	358	7.54575e-05	control-5
1972	359	7.54575e-05	control-5
1973	360	7.54575e-05	control-5
1974	361	7.54575e-05	control-5
1975	362	7.54575e-05	control-5
1976	363	7.54575e-05	control-5
1977	364	7.54575e-05	control-5
1978	365	7.54575e-05	control-5
1979	366	7.54575e-05	control-5
1980	367	7.54575e-05	control-5
1981	368	7.54575e-05	control-5
1982	369	7.54575e-05	control-5
1983	370	7.54575e-05	control-5
1984	371	7.54575e-05	control-5
1985	372	7.54575e-05	control-5
1986	373	3.77287e-05	control-5
1987	374	3.77287e-05	control-5
1988	375	3.77287e-05	control-5
1989	376	3.77287e-05	control-5
1990	377	3.77287e-05	control-5
1991	378	3.77287e-05	control-5
1992	379	3.77287e-05	control-5
1993	380	3.77287e-05	control-5
1994	381	3.77287e-05	control-5
1995	382	3.77287e-05	control-5
1996	383	3.77287e-05	control-5
1997	384	3.77287e-05	control-5
1998	385	3.77287e-05	control-5
1999	386	3.77287e-05	control-5
[truncated: 3,749 more rows]

## Sheet: chao 1
SampleID	chao1
Control-1	303.385
Control-2	452.909
Control-3	639.392
Control-4	654.219
Control-5	782.976
Control-6	521.818
DKD-1	350
DKD-2	408.364
DKD-3	373.059
DKD-4	383.029
DKD-5	387
DKD-6	321.214
QRXZF-1	308.5
QRXZF-2	277.045
QRXZF-3	225.385
QRXZF-4	280.273
QRXZF-5	109.1
QRXZF-6	248.786

## Sheet: observed_species
SampleID	observed_species
Control-1	267
Control-2	347
Control-3	527
Control-4	472
Control-5	565
Control-6	417
DKD-1	310.8
DKD-2	360
DKD-3	321
DKD-4	316
DKD-5	328
DKD-6	258
QRXZF-1	266
QRXZF-2	250
QRXZF-3	189
QRXZF-4	229
QRXZF-5	100
QRXZF-6	225

## Sheet: PCA
Axis1	Axis2	samples
control-1	-0.098275	0.155761	control
control-2	-0.505428	0.0362477	control
control-3	-0.74926	-0.04888	control
control-4	-0.670514	-0.0820597	control
control-5	-0.736223	-0.0368705	control
control-6	-0.493362	-0.0353072	control
DKD-1	0.325068	-0.379828	DKD
DKD-2	0.303104	-0.415349	DKD
DKD-3	0.320335	-0.338681	DKD
DKD-4	0.18891	-0.323844	DKD
DKD-5	0.291357	-0.302174	DKD
DKD-6	0.340152	-0.243627	DKD
QRXZF-1	0.231822	0.0218764	QRXZF
QRXZF-2	0.250491	0.00315416	QRXZF
QRXZF-3	0.253403	0.562552	QRXZF
QRXZF-4	0.287528	0.42456	QRXZF
QRXZF-5	0.159418	0.600779	QRXZF
QRXZF-6	0.301476	0.40169	QRXZF

## Sheet: NMSD
samples	NMDS1	NMDS2	group
control-1	-0.0701499	-0.974101	control
control-2	-0.773338	-0.422345	control
control-3	-1.52936	-0.0817036	control
control-4	-1.81801	0.128244	control
control-5	-1.42982	-0.289119	control
control-6	-0.944386	-0.46286	control
DKD-1	0.312345	0.796892	DKD
DKD-2	0.426806	1.04208	DKD
DKD-3	0.272524	0.506055	DKD
DKD-4	-0.108795	0.75598	DKD
DKD-5	0.202328	0.560571	DKD
DKD-6	0.636	0.604556	DKD
QRXZF-1	0.417816	-0.143813	QRXZF
QRXZF-2	0.475342	0.129653	QRXZF
QRXZF-3	0.750284	-0.731367	QRXZF
QRXZF-4	0.733547	-0.360659	QRXZF
QRXZF-5	1.63786	-0.864792	QRXZF
QRXZF-6	0.809005	-0.193266	QRXZF
